# Supplementary material for: The antihyperlipidemic effect of Fu-Ling-Pi is associated with abnormal fatty acid metabolism as assessed by UPLC-HDMS-based lipidomics
Source: Royal Society of Chemistry journal article supplement (doi:10.1039/c5ra09766e), 2015-01-01
Supplement: c5ra09766e1.pdf [file c5ra09766e1.pdf]

Supplementary information

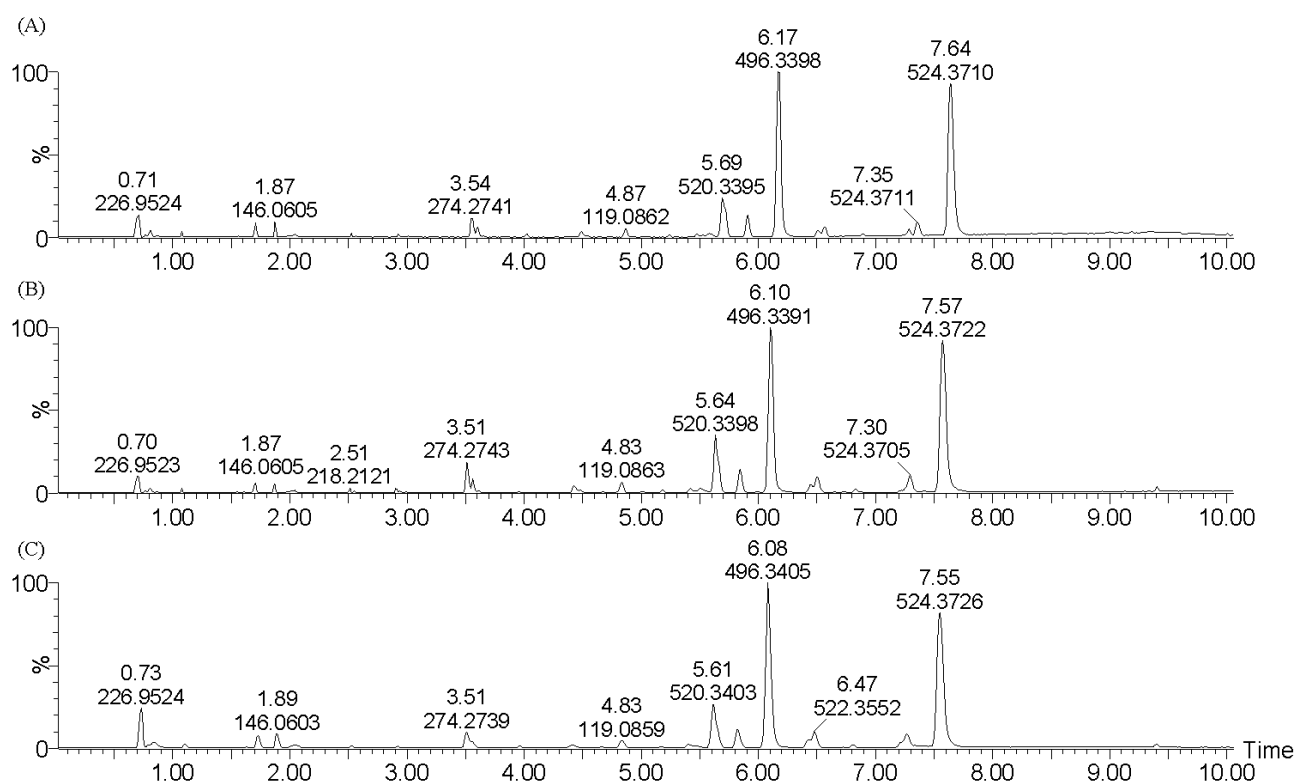

Figure S1. Representative base peak intensity (BPI) chromatograms obtained from the positive ion UPLC-HDMS analyses of normal CTL group (A), diet-induced HLE (B) and HLE+SLPC group (C).

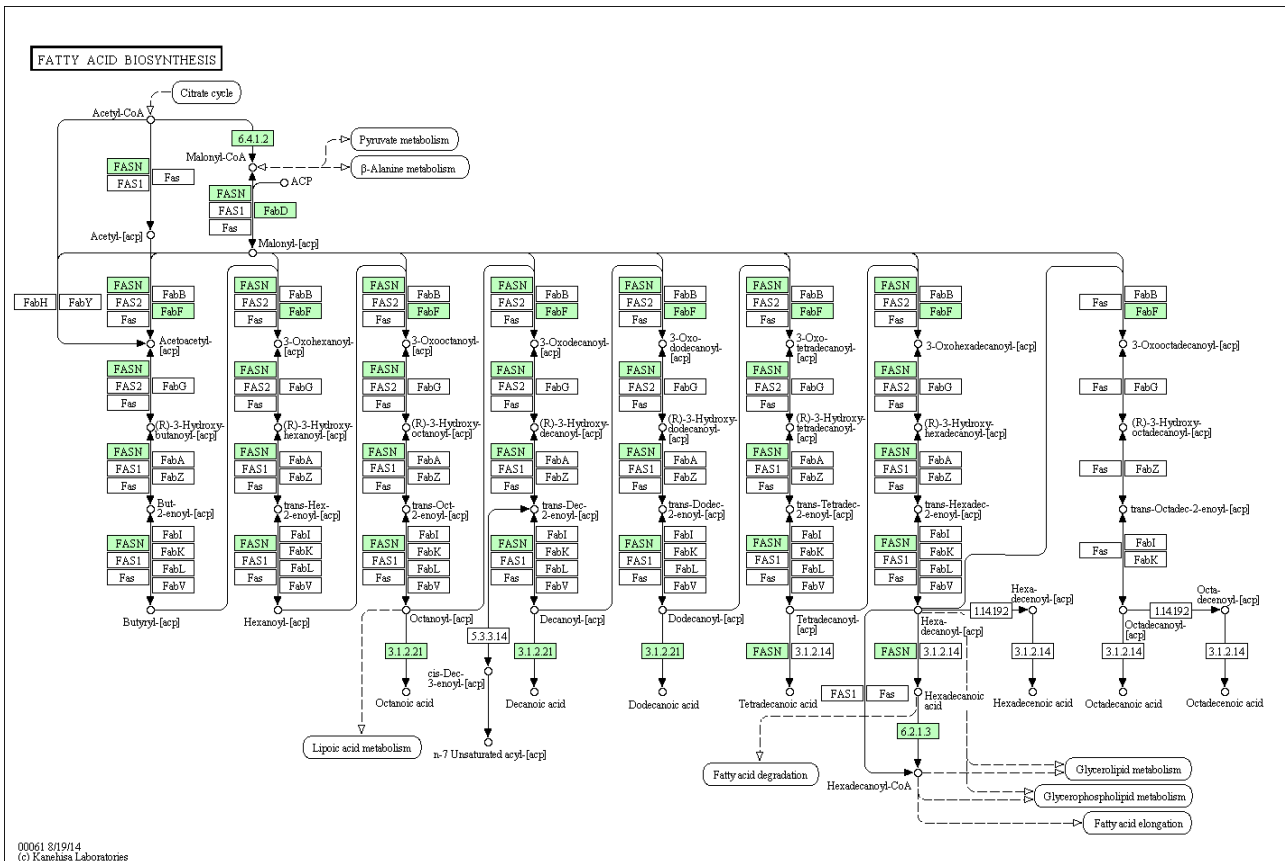

Figure S2. Overview of fatty acid biosynthesis with MetPA



**FATTY ACID ELONGATION**

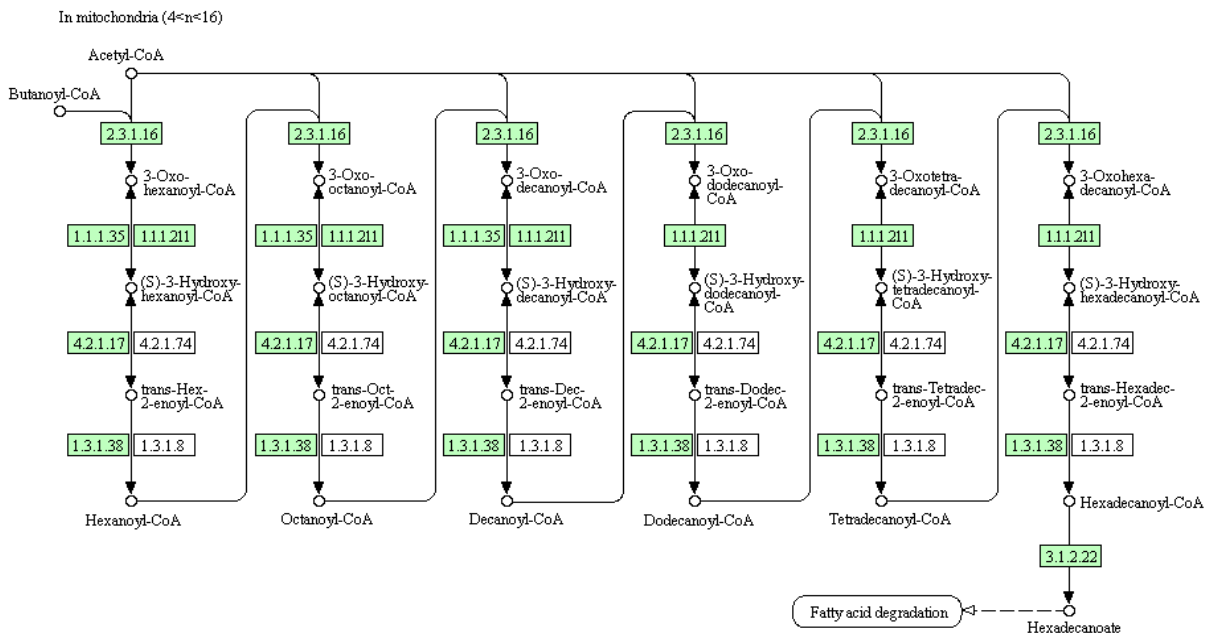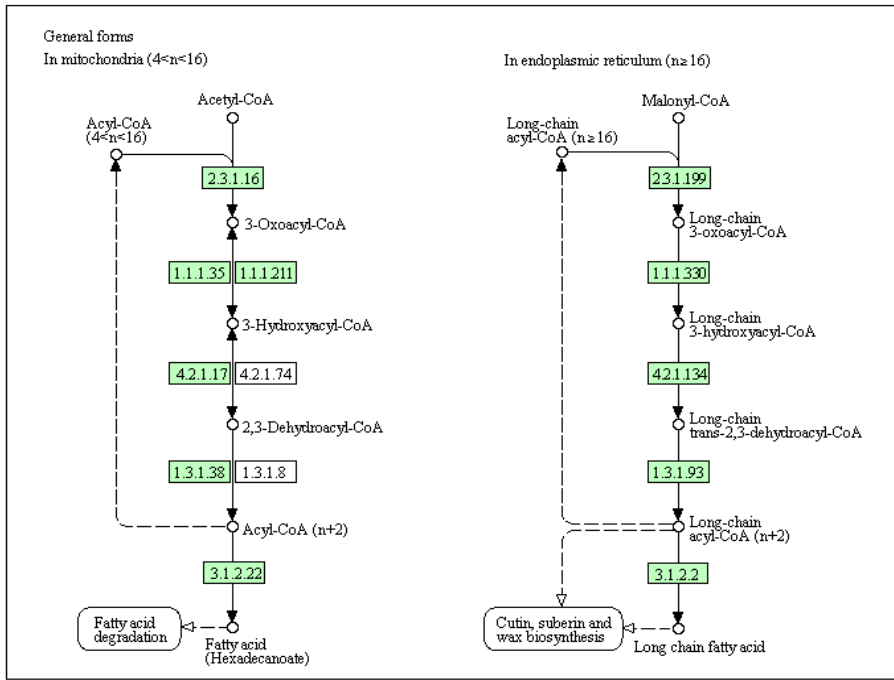

00062 1/29/15  
 (c) Kanehisa Laboratories

Figure S4. Overview of fatty acid elongation in mitochondria with MetPA

BIOSYNTHESIS OF UNSATURATED FATTY ACIDS

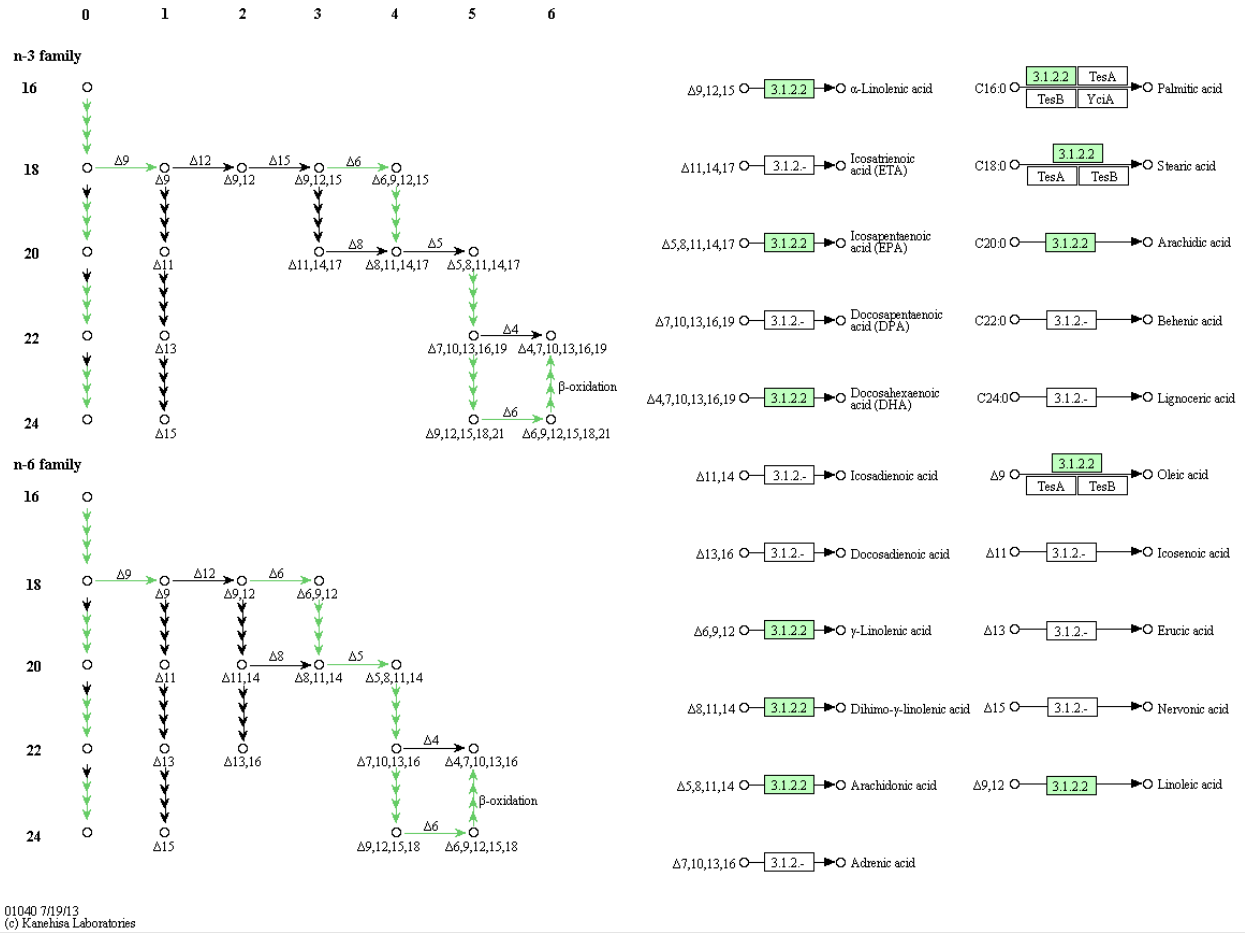

Figure S5. Overview of biosynthesis of unsaturated fatty acids with MetPA
